# Supplementary material for: Application of a battery of biomarkers in mussel digestive gland to assess long-term effects of the Prestige oil spill in Galicia and the Bay of Biscay: Lysosomal responses
Source: Royal Society of Chemistry journal article supplement (doi:10.1039/c0em00409j), 2011-01-01
Supplement: c0em00409j.pdf [file c0em00409j.pdf]

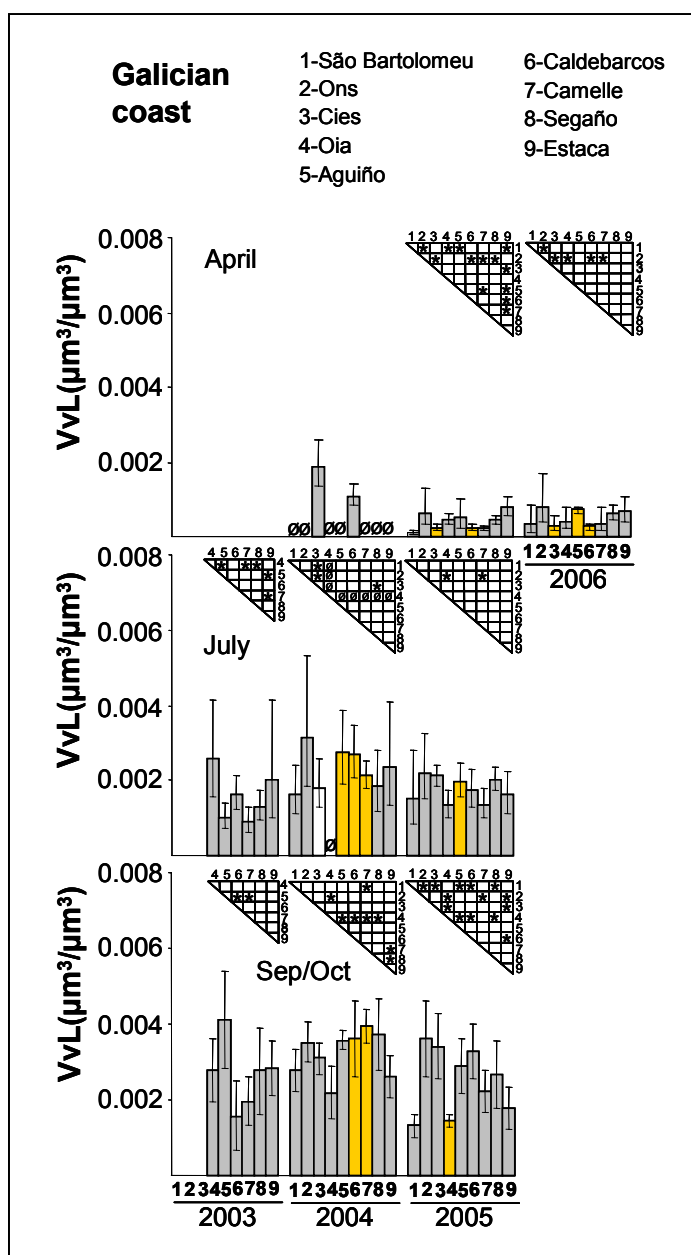

**Fig. S1:** Lysosomal volume density (VvL) in digestive cells of mussels sampled in Galician coast from July 2003 to April 2006. Histograms include statistics for comparison among sampling years and localities for each sampling month (April, July and September/October). Vertical segments represent standard deviations. Asterisks in triangular matrices indicate significant differences ( $p < 0.05$ ) between pairs of localities within each sampling time according to Duncan's test performed after one-way ANOVA. For each locality, each colour (grey, yellow or blue) in the histogram bars corresponds to a subgroup significantly different ( $p < 0.05$ ) among years for each sampling month, according to Duncan's test performed after one-way ANOVA.

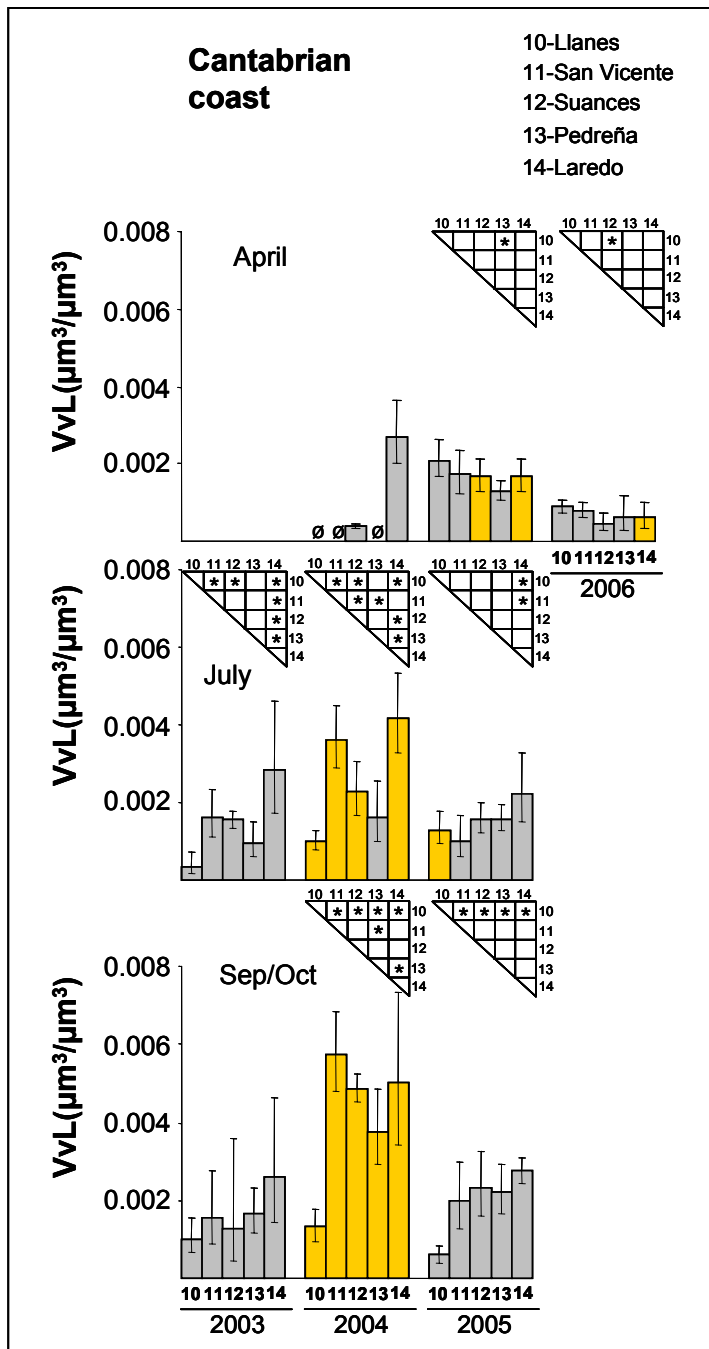

**Fig. S2:** Lysosomal volume density (VvL) in digestive cells of mussels sampled in Cantabrian coast from July 2003 to April 2006. Histograms include statistics for comparison among sampling years and localities for each sampling month (April, July and September/October). Vertical segments represent standard deviations. Asterisks in triangular matrices indicate significant differences ( $p < 0.05$ ) between pairs of localities within each sampling time according to Duncan's test performed after one-way ANOVA. For each locality, each colour (grey, yellow or blue) in the histogram bars corresponds to a subgroup significantly different ( $p < 0.05$ ) among years for each sampling month, according to Duncan's test performed after one-way ANOVA.

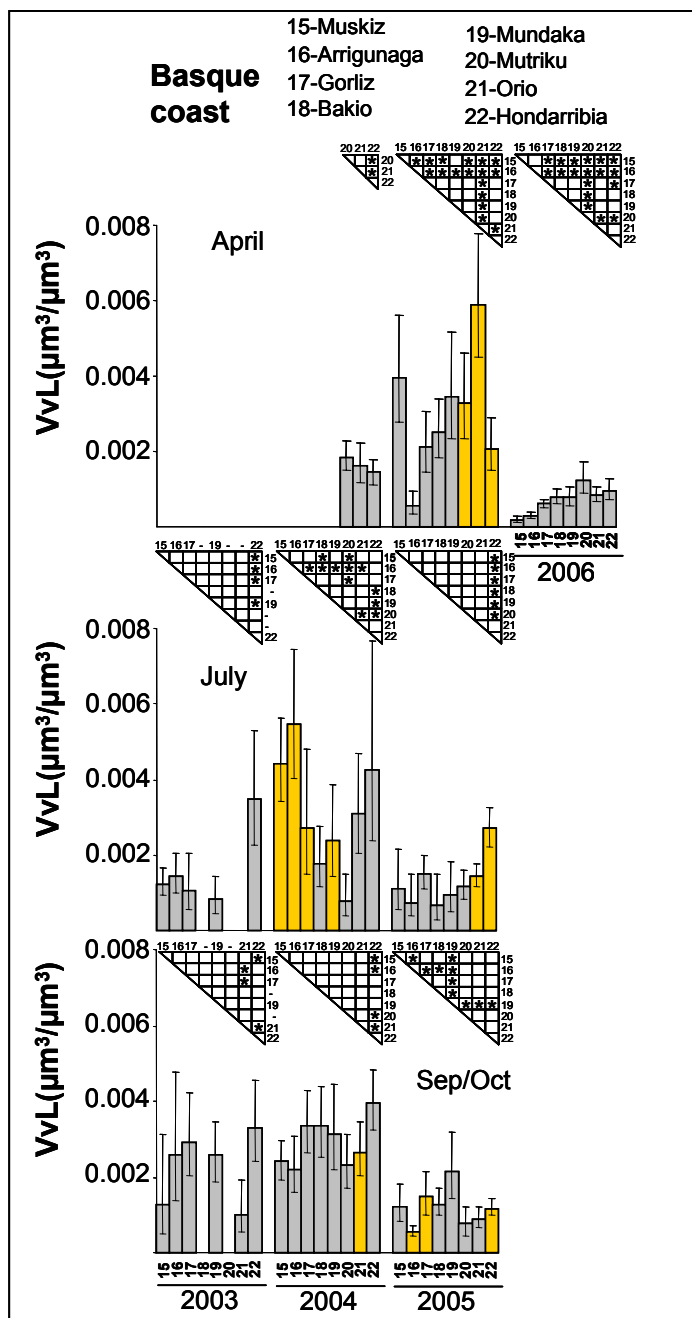

**Fig. S3:** Lysosomal volume density (VvL) in digestive cells of mussels sampled in Basque coast from July 2003 to April 2006. Histograms include statistics for comparison among sampling years and localities for each sampling month (April, July and September/October). Vertical segments represent standard deviations. Asterisks in triangular matrices indicate significant differences ( $p < 0.05$ ) between pairs of localities within each sampling time according to Duncan's test performed after one-way ANOVA. For each locality, each colour (grey, yellow or blue) in the histogram bars corresponds to a subgroup significantly different ( $p < 0.05$ ) among years for each sampling month, according to Duncan's test performed after one-way ANOVA.

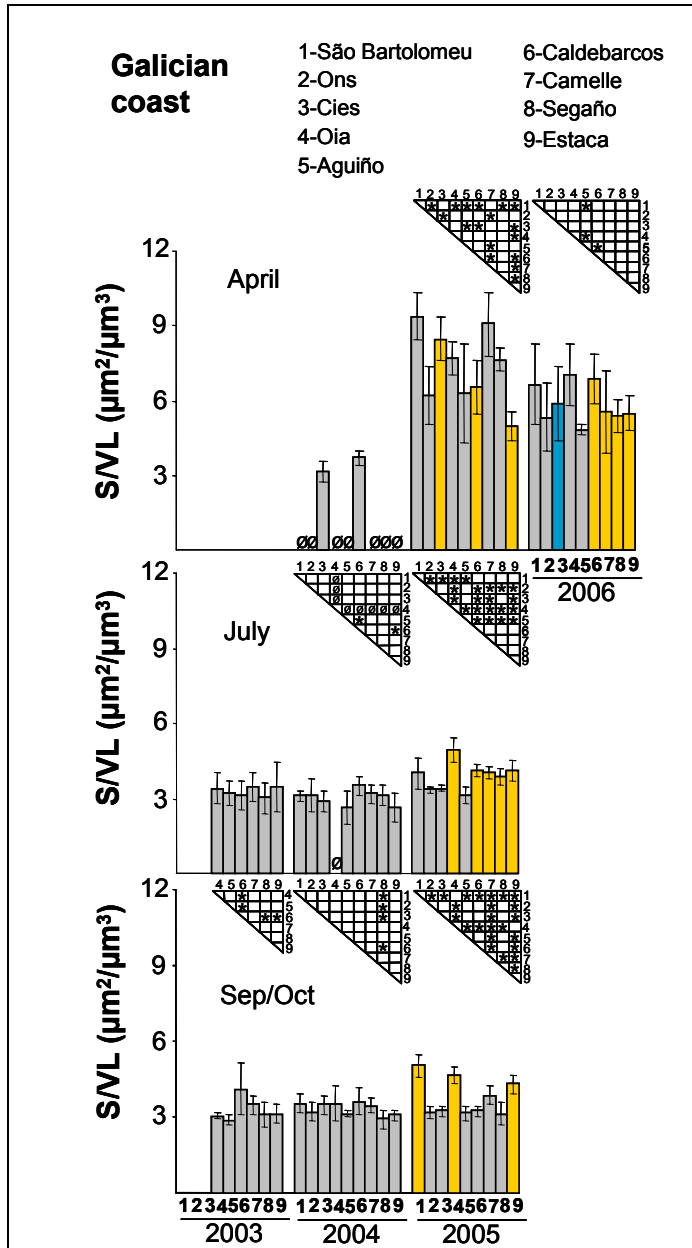

**Fig. S4:** Lysosomal surface-to-volume ratio (S/VL) in digestive cells of mussels sampled in Galician coast from July 2003 to April 2006. Histograms include statistics for comparison among sampling years and localities for each sampling month (April, July and September/October). Vertical segments represent standard deviations. Asterisks in triangular matrices indicate significant differences ( $p < 0.05$ ) between pairs of localities within each sampling time according to Duncan's test performed after one-way ANOVA. For each locality, each colour (grey, yellow or blue) in the histogram bars corresponds to a subgroup significantly different ( $p < 0.05$ ) among years for each sampling month, according to Duncan's test performed after one-way ANOVA.

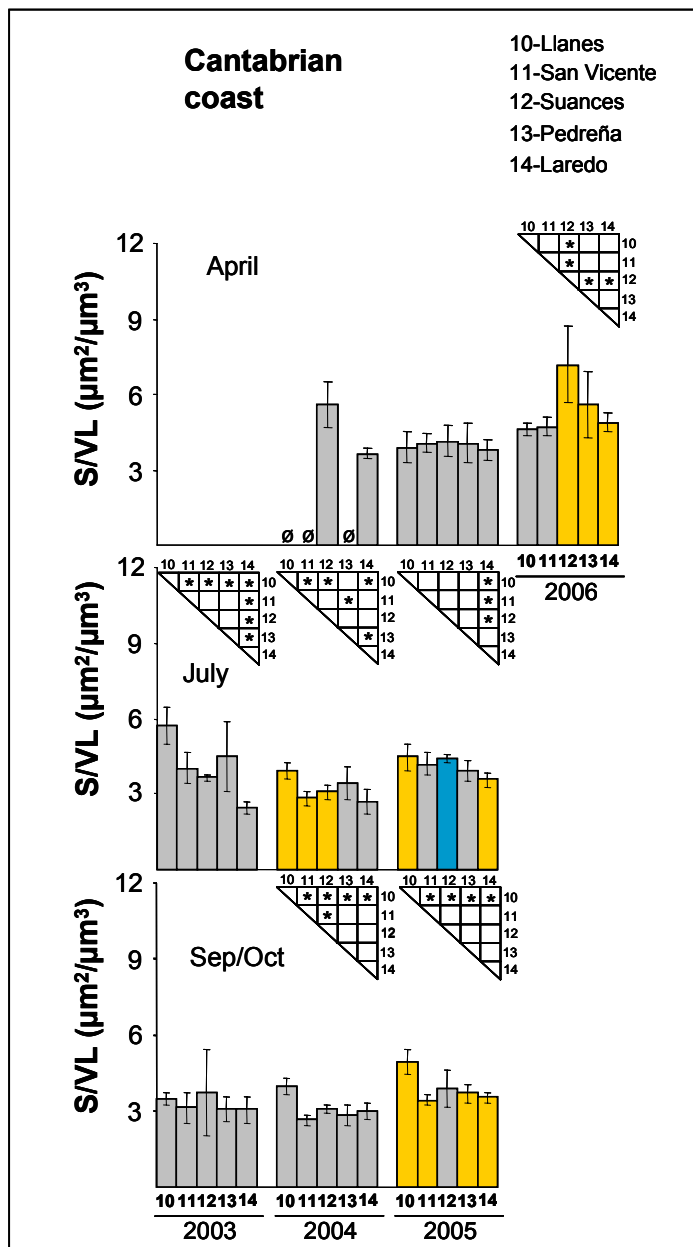

**Fig. S5:** Lysosomal surface-to-volume ratio (S/VL) in digestive cells of mussels sampled in Cantabrian coast from July 2003 to April 2006. Histograms include statistics for comparison among sampling years and localities for each sampling month (April, July and September/October). Vertical segments represent standard deviations. Asterisks in triangular matrices indicate significant differences ( $p < 0.05$ ) between pairs of localities within each sampling time according to Duncan's test performed after one-way ANOVA. For each locality, each colour (grey, yellow or blue) in the histogram bars corresponds to a subgroup significantly different ( $p < 0.05$ ) among years for each sampling month, according to Duncan's test performed after one-way ANOVA.

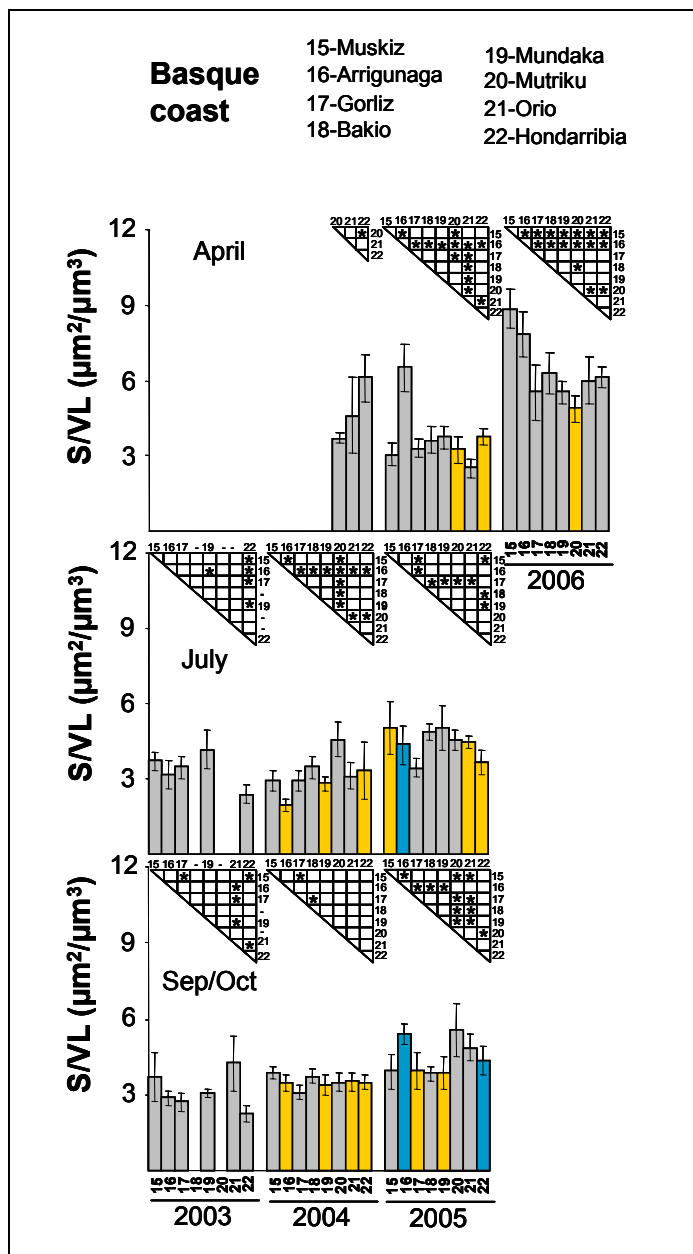

**Fig. S6:** Lysosomal surface-to-volume ratio (S/VL) in digestive cells of mussels sampled in Basque coast from July 2003 to April 2006. Histograms include statistics for comparison among sampling years and localities for each sampling month (April, July and September/October). Vertical segments represent standard deviations. Asterisks in triangular matrices indicate significant differences ( $p < 0.05$ ) between pairs of localities within each sampling time according to Duncan's test performed after one-way ANOVA. For each locality, each colour (grey, yellow or blue) in the histogram bars corresponds to a subgroup significantly different ( $p < 0.05$ ) among years for each sampling month, according to Duncan's test performed after one-way ANOVA.
